# Supplementary material
Source: PubMed Central journal article supplement (PMC6003858)
Supplement: NIHMS957141-supplement-2.pdf [file NIHMS957141-supplement-2.pdf]

| N60 mAb   |          | gp120  | FLSC   | D368R  | Core   | Core/V3 |
|-----------|----------|--------|--------|--------|--------|---------|
| Lineage 1 | N60P2.1  | Orange | Yellow | Yellow | Yellow | Yellow  |
|           | N60P1.1  | Orange | Yellow | Yellow | Yellow | Yellow  |
|           | N60P25.1 | Yellow | Yellow | Yellow | Yellow | Yellow  |
|           | N60P31.1 | Yellow | Yellow | Yellow | Yellow | Yellow  |
| Lineage 2 | N60P22   | Orange | Yellow | Yellow | Orange | Red     |
|           | N60P38   | Orange | Yellow | Yellow | Red    | Orange  |
| Lineage 3 | N60P30   | Yellow | Orange | Yellow | Yellow | Yellow  |
| Lineage 4 | N60P36   | Yellow | Orange | Yellow | Yellow | Yellow  |
| Lineage 5 | N60P39   | Yellow | Orange | Yellow | Yellow | Orange  |
|           | N6039.1  | Yellow | Orange | Yellow | Yellow | Yellow  |
|           | N60P47   | Yellow | Orange | Yellow | Yellow | Yellow  |
|           | N60P48   | Yellow | Orange | Yellow | Yellow | Yellow  |
| Lineage 6 | N60P51   | Yellow | Orange | Yellow | Yellow | Orange  |
| Lineage 7 | N60P35   | Orange | Orange | Red    | Yellow | Red     |
|           | N60P37   | Orange | Orange | Orange | Yellow | Red     |

A.

| N49 mAb   |         | gp120  | FLSC   | D368R  | Core   | Core/V3 |
|-----------|---------|--------|--------|--------|--------|---------|
| Lineage 1 | N49P6   | Orange | Yellow | Yellow | Orange | Yellow  |
|           | N49P7   | Orange | Yellow | Yellow | Orange | Orange  |
|           | N49P7.1 | Orange | Yellow | Yellow | Orange | Orange  |
|           | N49P11  | Orange | Yellow | Yellow | Yellow | Yellow  |
| Lineage 2 | N60P9   | Orange | Yellow | Yellow | Orange | Orange  |

| ELISA AUC | Color  |
|-----------|--------|
| >1.25     | Red    |
| 1.01-1.25 | Orange |
| 0.76-1.0  | Orange |
| 0.51-0.75 | Yellow |
| 0.26-0.50 | Yellow |
| 0.11-0.25 | Yellow |
| <0.1      | Yellow |

B.
