# Supplementary material
Source: PubMed Central journal article supplement (PMC6003858)

N49P6 gp120 (Chi<sup>2</sup> 2.64; KD=1.59E-8)

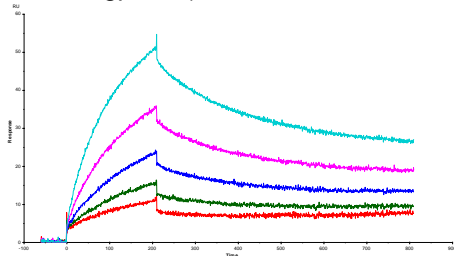

N49P6 D368R

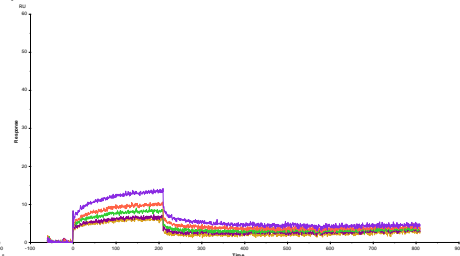

N49P7 gp120 (Chi<sup>2</sup> 3.61; KD=8.602E-10)

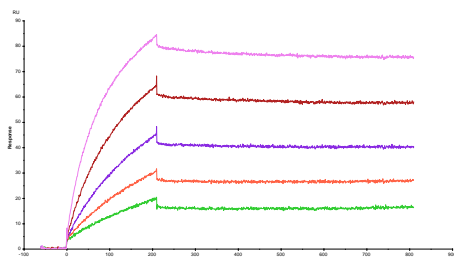

N49P7 D368R

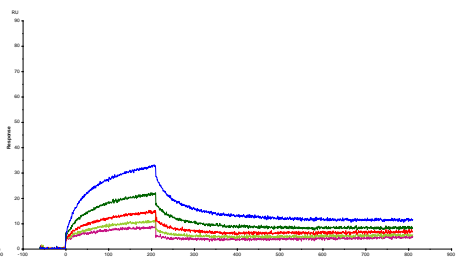

N49P7.1 (Chi<sup>2</sup> 1.41 KD=1.143E-9)

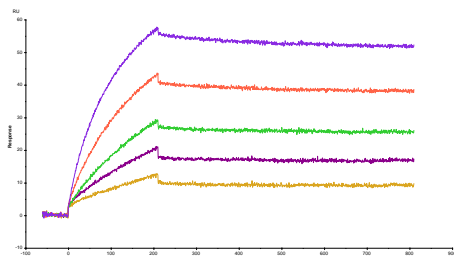

N49P7.1 D368R

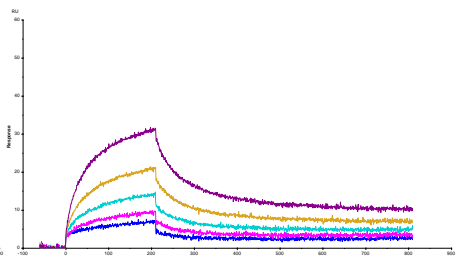

N49P9 gp120 (Chi<sup>2</sup> 1.24; KD=2.456E-8)

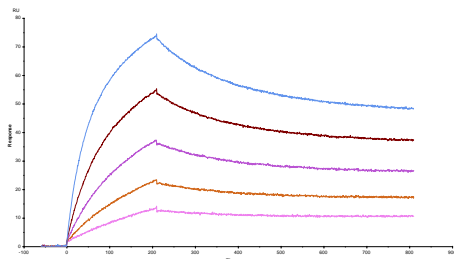

N49P9 D368R

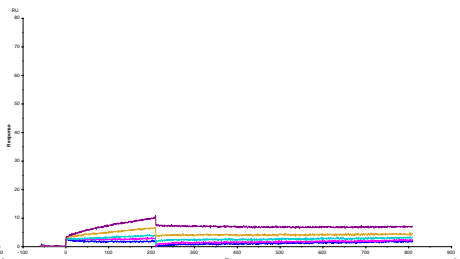

N49P11 gp120 (Chi<sup>2</sup> 0.541; KD=1.562E-8)

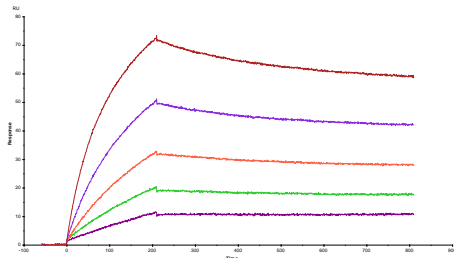

N49P11 D368R

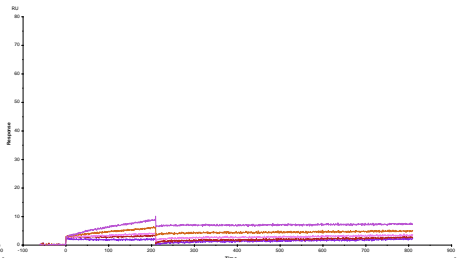

Supplement: NIHMS957141-supplement-3.pdf [file NIHMS957141-supplement-3.pdf]
