# Supplementary material
Source: PubMed Central journal article supplement (PMC6003858)
Supplement: NIHMS957141-supplement-4.pdf [file NIHMS957141-supplement-4.pdf]

| Virus ID       | Clade | Tier | IC50 |
|----------------|-------|------|------|
| JRFL_JB        | B     | NC   |      |
| T280-5         | AG    | NC   |      |
| T33-7          | AG    | NC   |      |
| TH976.17       | AE    | NC   |      |
| HXB2.DG        | B     | 1B   |      |
| 3337.V2.C6     | CD    | NC   |      |
| CNE12          | B     | NC   |      |
| CNE57          | B     | NC   |      |
| YU2.DG         | B     | NC   |      |
| CNE3           | AE    | NC   |      |
| ZM106F.PB9     | C     | NC   |      |
| 271-11         | AG    | 1B   |      |
| CH181.12       | BC    | 2    |      |
| JRCSF_JB       | B     | NC   |      |
| CNE55          | AE    | NC   |      |
| 6101           | B     | NC   |      |
| 92UG037.8      | A     | NC   |      |
| 3988           | B     | NC   |      |
| CNE14          | B     | NC   |      |
| CNE40          | BC    | NC   |      |
| 398-F1_F6_20   | A     | NC   |      |
| CNE59          | AE    | NC   |      |
| Q168.a2        | AD    | NC   |      |
| 0330.v4.c3     | A     | NC   |      |
| ZM215F.PB8     | C     | NC   |      |
| 3589.V1.C4     | AC    | NC   |      |
| 92RW020.2      | A     | NC   |      |
| CNE10          | B     | NC   |      |
| CNE7           | BC    | NC   |      |
| 3468.V1.C12    | AD    | NC   |      |
| CH117.4        | BC    | 2    |      |
| 0439.v5.c1     | A     | 2    |      |
| M02138         | AE    | NC   |      |
| CNE56          | AE    | NC   |      |
| CH070.1        | BC    | 3    |      |
| T266-60        | AG    | NC   |      |
| CNE4           | B     | NC   |      |
| BG1168.01      | B     | NC   |      |
| QH0515.01      | B     | NC   |      |
| T253-11        | AG    | NC   |      |
| NKU3006.ec1    | D     | NC   |      |
| 5768           | B     | NC   |      |
| 57128.vrc15    | D     | NC   |      |
| KER2018.11     | A     | NC   |      |
| CNE15          | BC    | NC   |      |
| A03349M1.vrc4a | D     | NC   |      |
| CH038.12       | BC    | 3    |      |
| 6545.V3.C13    | AC    | NC   |      |
| 242-14         | AG    | 1B   |      |
| 7165           | B     | NC   |      |
| HO86.8         | B     | 1B   |      |
| 3326.V4.C3     | CD    | NC   |      |
| 3718.v3.c11    | A     | 2    |      |

| IC50 ug/ml   | Color |
|--------------|-------|
| .0061-.0243  |       |
| .0244-.0976  |       |
| .0977-.3905  |       |
| .3906-1.5624 |       |
| 1.5625-6.24  |       |
| 6.25-50      |       |
| >50          |       |
