# Supplementary material
Source: PubMed Central journal article supplement (PMC6003858)
Supplement: NIHMS957141-supplement-8.pdf [file NIHMS957141-supplement-8.pdf]

| Virus        | Tier        | Clade       | Plasma ID50 Titer in TZM.bl Cells (1/x) |            |          |           |          | gp120-FT |  |
|--------------|-------------|-------------|-----------------------------------------|------------|----------|-----------|----------|----------|--|
|              |             |             | 10/1/2008                               | 10/12/2009 | 9/9/2010 | 1/10/2013 | 2/1/2013 | 2/1/2013 |  |
| 6535.3       | 1B          | B           | 3,514                                   | 2,028      | 2,178    | 1,713     | NT       | NT       |  |
| QH0692.42    | 2           | B           | 530                                     | 422        | 545      | 335       | 549      | <40      |  |
| SC422661.8   | 2           | B           | 973                                     | 630        | 650      | 1,008     | 752      | <40      |  |
| PVO.4        | 3           | B           | 1,384                                   | 548        | 800      | 2,046     | 905      | 55       |  |
| TRO.11       | 2           | B           | 1,820                                   | 1,074      | 820      | 1,174     | 794      | 52       |  |
| AC10.0.29    | 2           | B           | 3,655                                   | 1,884      | 1,709    | 1,586     | 1,040    | <40      |  |
| RHPA4259.7   | 2           | B           | 1,988                                   | 1,543      | 3,259    | 2,089     | 1,863    | <40      |  |
| THRO4156.18  | 2           | B           | 1,149                                   | 721        | 438      | 506       | 361      | 51       |  |
| REJO4541.67  | 2           | B           | 2,112                                   | 1,576      | 1,133    | 2,143     | 919      | <40      |  |
| TRJO4551.58  | 3           | B           | 269                                     | 479        | 395      | 728       | 293      | 66       |  |
| WITO4160.33  | 2           | B           | 268                                     | 221        | 127      | 732       | 164      | <40      |  |
| CAAN5342.A2  | 2           | B           | 6,032                                   | 2,197      | 1,367    | 1,906     | 851      | <40      |  |
| BaL.26       | 1B          | B           | NT                                      | NT         | NT       | NT        | 1,968    | <40      |  |
| Du156.12     | 2           | C           | NT                                      | 1,000      | NT       | 1,343     | NT       | NT       |  |
| Du172.17     | 2           | C           | NT                                      | 97         | NT       | 468       | NT       | NT       |  |
| Du422.1      | 2           | C           | NT                                      | 636        | NT       | 581       | NT       | NT       |  |
| ZM53M.PB12   | 2           | C           | NT                                      | 3,183      | NT       | 1,715     | NT       | NT       |  |
| ZM135M.PL10a | 2           | C           | NT                                      | 221        | NT       | 425       | NT       | NT       |  |
| ZM197M.PB7   | 1B          | C           | NT                                      | 455        | NT       | 1,062     | NT       | NT       |  |
| ZM214M.PL15  | 2           | C           | NT                                      | 412        | NT       | 338       | NT       | NT       |  |
| Q23.17       | 1B          | A           | NT                                      | 3,592      | NT       | 2,895     | NT       | NT       |  |
| Q259.d2.17   | 2           | A           | NT                                      | 2,873      | NT       | 1,528     | NT       | NT       |  |
| Q461.e2      | 2           | A           | NT                                      | 77         | NT       | 184       | NT       | NT       |  |
| Q168.a2      | 2           | A           | NT                                      | 1,303      | NT       | 942       | NT       | NT       |  |
| 3415.v1.c1   | 2           | A           | NT                                      | 1,097      | NT       | 1,318     | NT       | NT       |  |
| 0439.v5.c1   | 2           | A           | NT                                      | 499        | NT       | 588       | NT       | NT       |  |
| 0260.v5.c1   | 2           | A           | NT                                      | 3,519      | NT       | 1,957     | NT       | NT       |  |
| 3365.v2.c20  | 2           | A           | NT                                      | 869        | NT       | 1,425     | NT       | NT       |  |
| T257-31      | 3           | CRF02_AG    | NT                                      | 97         | NT       | 316       | NT       | NT       |  |
| 263-8        | 2           | CRF02_AG    | NT                                      | 493        | NT       | 1,104     | NT       | NT       |  |
| 211-9        | 2           | CRF02_AG    | NT                                      | 108        | NT       | 780       | NT       | NT       |  |
| MuLV (Neg)   | Neg control | Neg control | 24                                      | 30         | <20      | 186       | 80       | <40      |  |

**Table S1. N60 plasma neutralization potency and breadth from 2008-2013, Related to Figure 1.** Plasma from patient N60 was tested against a panel of multiclade HIV pseudoviruses, demonstrating potency and breadth for more than 4 years. In the last column gp120-FT (plasma that was passed over a BaL-gp120 column) was tested against a panel of HIV pseudoviruses for neutralization (in each case, the gp120-FT loses potency compared to the parent plasma, confirming that the fraction affinity purified against the gp120 monomer contains the bulk of neutralizing antibodies). Numerical values given as ID50, the Inhibitory Dose 50. NT= not tested. Green boxes represent neutralization twice over background (MuLV) value.

| Monoclonal Antibody |          | GenBank number       | Epitope               | Heavy Chain | Light chain | CDRL3 length | SHM (Heavy/Light) | Frequency of CDR3 (per 1000) |                  |                  |
|---------------------|----------|----------------------|-----------------------|-------------|-------------|--------------|-------------------|------------------------------|------------------|------------------|
|                     |          |                      |                       |             |             |              |                   | Peripheral plasmablast       | Bone marrow 138- | Bone marrow 138+ |
| Lineage 1           | N60P1.1  | MG791872<br>MG819662 | CD4bs                 | 1-2         | κ1-5        | 5            | 36%/26%           | 0                            | 2.48             | 1.62             |
|                     | N60P2.1  | MG819649<br>MG819677 | CD4bs                 | 1-2         | κ1-5        | 5            | 38%/29%           | 0                            | 2.48             | 0                |
|                     | N60P25.1 | MG819648<br>MG819664 | CD4bs                 | 1-2         | κ1-5        | 5            | 33%/26%           | 0                            | 2.48             | 0                |
|                     | N60P31.1 | MG819647<br>MG819665 | CD4bs                 | 1-2         | κ1-5        | 5            | 42%/35%           | 0                            | 2.48             | 0                |
| Lineage 2           | N60P22   | MG819659<br>MG819666 | CD4bs                 | 4-31        | κ3-20       | 9            | 9%/11%            | 1.62                         | 2.48             | 9.69             |
|                     | N60P38   | MG819653<br>MG819667 | CD4bs                 | 4-31        | κ3-20       | 9            | 9%/11%            | 0                            | 2.48             | 0                |
| Lineage 3           | N60P30   | MG819660<br>MG819670 | CD4i<br>(Cluster A)   | 1-2         | κ3-20       | 8            | 21%/12%           | 0                            | 2.48             | 0                |
| Lineage 4           | N60P36   | MG819651<br>MG819671 | CoR-BS<br>(Cluster C) | 1-69        | κ3-20       | 8            | 11%/9%            | 0                            | 4.96             | 4.85             |
| Lineage 5           | N60P39   | MG819654<br>MG819672 | CoR-BS<br>(Cluster C) | 1-69        | κ3-20       | 9            | 11%/9%            | 0                            | 2.48             | 1.62             |
|                     | N6039.1  | MG819656<br>MG819673 | CoR-BS<br>(Cluster C) | 1-69        | κ3-20       | 9            | 11%/9%            | 0                            | 2.48             | 1.62             |
|                     | N60P47   | MG819655<br>MG819674 | CoR-BS<br>(Cluster C) | 1-69        | κ3-20       | 9            | 16%/6%            | 0                            | 2.48             | 0                |
|                     | N60P48   | MG819657<br>MG819675 | CoR-BS<br>(Cluster C) | 1-69        | κ3-20       | 9            | 15%/6%            | 0                            | 4.96             | 6.46             |
| Lineage 6           | N60P51   | MG819658<br>MG819676 | CoR-BS<br>(Cluster C) | 1-69        | κ3-20       | 10           | 20%/9%            | 0                            | 12.4             | 3.38             |
| Lineage 7           | N60P35   | MG819650<br>MG819668 | V3                    | 5-51        | λ6-57       | 9            | 18%/14%           | 0                            | 2.48             | 4.85             |
|                     | N60P37   | MG819652<br>MG819669 | V3                    | 5-51        | λ6-57       | 9            | 17%/16%           | 0                            | 2.48             | 6.46             |

**Table S2. Characteristics of isolated N60 P series antibodies, Related to Figure 3.** mAb = monoclonal antibody. SHM = somatic hypermutation given as a percent of germline V region for heavy chains, and VJ region for light chains. CD4bs = CD4-binding site antibody. CoR-BS= Co-Receptor binding site antibody. Cluster A= competes with A32. Cluster C= competes with 19e and/or

| mAb       |          | Epitope               | SF162<br>LS | BaL<br>.26 | SS<br>1198.1 | 6535.3 | QH0692<br>.42 | SC4226<br>61.8 | PVO.4 | TRO<br>.11 | AC10<br>0.29 | RHPA<br>4259.7 | THRO<br>4156.18 | REJO<br>4541.67 | TRJO<br>4551.58 | WITO<br>4160.33 | CAAN<br>5342.A2 |
|-----------|----------|-----------------------|-------------|------------|--------------|--------|---------------|----------------|-------|------------|--------------|----------------|-----------------|-----------------|-----------------|-----------------|-----------------|
| Lineage 1 | N60P1.1  | CD4bs                 | 12.92       | >50        | 0.61         | 3.84   | 15.48         | 0.75           | 0.46  | 6.32       | >25          | 4.22           | >25             | 1.58            | 7.195           | >25             | 1.64            |
|           | N60P2.1  | CD4bs                 | >50         | >50        | 1.84         | >25    | 3.00          | 12.69          | 1.68  | 19.60      | >25          | 15.68          | >25             | >25             | >25             | >25             | 6.73            |
|           | N60P25.1 | CD4bs                 | 30.99       | >50        | 0.25         | 15.73  | 32.94         | 2.06           | 6.45  | 23.53      | >50          | 1.45           | >50             | 2.45            | >50             | >50             | 2.50            |
|           | N60P31.1 | CD4bs                 | >50         | >50        | >50          | >50    | >50           | >50            | >50   | 1.81       | >50          | >50            | 31.04           | >50             | >50             | >50             | >50             |
| Lineage 2 | N60P22   | CD4bs                 | 1.28        | 5.532      | 5.67         | 10.64  | 36.84         | >50            | >50   | >50        | >50          | >50            | 36.50           | >50             | >50             | >50             | >50             |
|           | N60P38   | CD4bs                 | 5.77        | >50        | 7.98         | >50    | >50           | >50            | >50   | >50        | >50          | >50            | >50             | >50             | >50             | >50             | >50             |
| Lineage 3 | N60P30   | CD4i<br>(Cluster A)   | >50         | >50        | >50          | >50    | >50           | >50            | >50   | >50        | >50          | >50            | >50             | >50             | >50             | >50             | >50             |
| Lineage 4 | N60P36   | CoR-BS<br>(Cluster C) | >50         | >50        | >50          | >50    | >50           | >50            | >50   | >50        | >50          | >50            | >50             | >50             | >50             | >50             | >50             |
| Lineage 5 | N60P39   | CoR-BS<br>(Cluster C) | 3.19        | >50        | 4.61         | >50    | >50           | >50            | >50   | >50        | >50          | >50            | >50             | >50             | >50             | >50             | >50             |
|           | N6039.1  | CoR-BS<br>(Cluster C) | 0.48        | 14.124     | 1.21         | >50    | 45.23         | >50            | >50   | >50        | >50          | >50            | >50             | >50             | >50             | >50             | >50             |
|           | N60P47   | CoR-BS<br>(Cluster C) | 0.68        | 20.084     | 1.91         | >40    | >40           | >40            | >40   | >40        | >40          | >40            | >40             | >40             | >40             | >40             | >40             |
|           | N60P48   | CoR-BS<br>(Cluster C) | 0.40        | 12.729     | 0.91         | >40    | 20.24         | >40            | >40   | >40        | >40          | >40            | >40             | >40             | >40             | >40             | >40             |
| Lineage 6 | N60P51   | CoR-BS<br>(Cluster C) | 0.32        | 8.963      | 1.03         | >25    | >25           | >25            | >25   | >25        | >25          | >25            | >25             | >25             | >25             | >25             | >25             |
| Lineage 7 | N60P35   | V3                    | 0.02        | 4.68       | 1.11         | >25    | >25           | >25            | >25   | >25        | >25          | 3.733          | >25             | >25             | >25             | >25             | >25             |
|           | N60P37   | V3                    | 0.03        | 4.076      | .99          | >25    | >25           | >25            | >25   | >25        | >25          | 11.62          | >25             | >25             | >25             | >25             | >25             |

**Table S3. Neutralization screening of N60 P series antibodies, Related to Figure 3.** HIV-1 neutralization was tested against a panel of Tier 1-3 pseudoviruses (see Methods). Results given as IC50 (inhibitory concentration 50) in ug/ml. Green boxes represents neutralization.

| mAb     | Genbank number       | Epitope | pI  | Heavy chain | Light chain    | CDRL3 length | SHM (Heavy/Light) | Frequency of CDR3 (per 1000) |                  |                  |
|---------|----------------------|---------|-----|-------------|----------------|--------------|-------------------|------------------------------|------------------|------------------|
|         |                      |         |     |             |                |              |                   | Peripheral plasmablast       | Bone marrow 138- | Bone marrow 138+ |
| N49P6   | MG819637<br>MG819642 | CD4bs   | 8.9 | 1-2         | $\lambda$ 2-11 | 5            | 42%/28%           | 0                            | 0                | 0.49             |
| N49P7   | MG819638<br>MG819643 | CD4bs   | 8.8 | 1-2         | $\lambda$ 2-11 | 5            | 38%/31%           | 0                            | 0                | 0.49             |
| N49P7.1 | MG819639<br>MG819644 | CD4bs   | 8.8 | 1-2         | $\lambda$ 2-11 | 5            | 38%/31%           | 0                            | 0                | 0.49             |
| N49P11  | MG819640<br>MG819645 | CD4bs   | 8.4 | 1-2         | $\lambda$ 2-11 | 5            | 35%/30%           | 3.18                         | 0                | 0                |
| N49P9   | MG819641<br>MG819646 | CD4bs   | 8.7 | 1-2         | $\lambda$ 2-23 | 5            | 38%/42%           | 3.18                         | 0                | 0.49             |

**Table S4. Properties of N49 P series mAbs, Related to Figure 4.** mAb = monoclonal antibody. SHM = somatic hypermutation (given as a percent of germline V region for heavy chains, and VJ region for light chains). CD4bs = CD4-binding site antibody. pI=isoelectric point

|                                                             | N49-P7 Fab-gp120 <sub>93TH057</sub><br>core <sub>e</sub> | N60-P23 Fab-gp120 <sub>93TH057</sub><br>core <sub>e</sub> |
|-------------------------------------------------------------|----------------------------------------------------------|-----------------------------------------------------------|
| <b>Data collection</b>                                      |                                                          |                                                           |
| Wavelength, Å                                               | 0.979                                                    | 0.979                                                     |
| Space group                                                 | P2 <sub>1</sub> 2 <sub>1</sub> 2 <sub>1</sub>            | C2                                                        |
| Cell parameters                                             |                                                          |                                                           |
| a, b, c, Å                                                  | 61.4, 63.9, 255.3                                        | 127.6, 68.6, 119.4                                        |
| α, β, γ, °                                                  | 90, 90, 90                                               | 90, 111.4, 90                                             |
| Complexes/a.u.                                              | 1                                                        | 1                                                         |
| Resolution, (Å)                                             | 50-2.69 (2.74-2.69)                                      | 50-2.38 (2.43-2.38)                                       |
| # of reflections                                            |                                                          |                                                           |
| Total                                                       | 73,281                                                   | 139,212                                                   |
| Unique                                                      | 23,639                                                   | 38,617                                                    |
| R <sub>merge</sub> <sup>b</sup> , %                         | 13.1 (74.9)                                              | 16.0 (90.8)                                               |
| R <sub>pim</sub> <sup>c</sup> , %                           | 7.7 (42.9)                                               | 9.7 (62.5)                                                |
| CC <sub>1/2</sub> <sup>d</sup>                              | 0.99 (0.67)                                              | 0.99 (0.47)                                               |
| Wilson B <sub>factor</sub> (1/Å <sup>2</sup> ) <sup>e</sup> | 53                                                       | 30                                                        |
| I/σ                                                         | 9.3 (1.1)                                                | 9.7 (1.2)                                                 |
| Completeness, %                                             | 80.6 (72.2)                                              | 100 (99.0)                                                |
| Redundancy                                                  | 3.1 (3.2)                                                | 3.6 (2.9)                                                 |
| <b>Refinement Statistics</b>                                |                                                          |                                                           |
| Resolution, Å                                               | 50.0 - 2.7                                               | 50.0 - 2.4                                                |
| R <sup>f</sup> , %                                          | 22.5                                                     | 21.4                                                      |
| R <sub>free</sub> <sup>g</sup> , %                          | 28.5                                                     | 25.8                                                      |
| # of atoms                                                  |                                                          |                                                           |
| Protein                                                     | 5,822                                                    | 5,905                                                     |
| Water                                                       | 27                                                       | 222                                                       |
| Ligand/Ion                                                  | 170                                                      | 133                                                       |
| Overall B value (Å) <sup>2</sup>                            |                                                          |                                                           |
| Protein                                                     | 50                                                       | 44                                                        |
| Water                                                       | 33                                                       | 36                                                        |
| Ligand/Ion                                                  | 64                                                       | 59                                                        |
| Root mean square deviation                                  |                                                          |                                                           |
| Bond lengths, Å                                             | 0.014                                                    | 0.009                                                     |
| Bond angles, °                                              | 1.2                                                      | 1.4                                                       |
| Ramachandran <sup>h</sup>                                   |                                                          |                                                           |
| favored, %                                                  | 89.0                                                     | 93.5                                                      |
| allowed, %                                                  | 9.7                                                      | 5.8                                                       |
| outliers, %                                                 | 1.3                                                      | 0.7                                                       |
| PDB ID                                                      | 6BCK                                                     | 5WB9                                                      |

**Table S5. Data collection and refinement statistics, Related to Figure 6.**

Values in parentheses are for highest-resolution shell

<sup>b</sup>R<sub>merge</sub> =  $\sum |I - \langle I \rangle| / \sum I$ , where  $I$  is the observed intensity and  $\langle I \rangle$  is the average intensity obtained from multiple observations of symmetry-related reflections after rejections

<sup>c</sup>R<sub>pim</sub> = as defined in (Weiss, 2001)

<sup>d</sup>CC<sub>1/2</sub> = as defined by Karplus and Diederichs (Karplus and Diederichs, 2012)

<sup>e</sup>Wilson B<sub>factor</sub> as calculated in (Popov and Bourenkov, 2003)

<sup>f</sup>R =  $\sum \|F_o| - |F_c\| / \sum |F_o|$ , where F<sub>o</sub> and F<sub>c</sub> are the observed and calculated structure factors, respectively

<sup>g</sup>R<sub>free</sub> = as defined by Brünger (Brünger, 1997)

<sup>h</sup>Calculated with MolProbity

|                                           |                                    | N49_P7 Fab-<br>gp120 <sub>93TH057</sub><br>core <sub>e</sub> | N60_P23 Fab-<br>gp120 <sub>93TH057</sub><br>core <sub>e</sub> | N6 Fab-<br>gp120 <sub>93TH057</sub><br>core <sub>e</sub> (5te6) | VRCO1-<br>gp120 <sub>93TH057</sub><br>core <sub>e</sub> (3ngb) |
|-------------------------------------------|------------------------------------|--------------------------------------------------------------|---------------------------------------------------------------|-----------------------------------------------------------------|----------------------------------------------------------------|
| <b>Buried Surface Area, Å<sup>2</sup></b> | <b>gp120 total</b>                 | <b>981</b>                                                   | <b>939</b>                                                    | <b>1132</b>                                                     | <b>1143</b>                                                    |
|                                           | Outer domain (OD)                  | 774                                                          | 872                                                           | 1000                                                            | 1036                                                           |
|                                           | Inner domain (ID)                  | 207                                                          | 67                                                            | 132                                                             | 107                                                            |
|                                           | Ratio of OD/ID                     | 3.74                                                         | 13.01                                                         | 7.58                                                            | 9.68                                                           |
|                                           | Loop D of OD                       | 339                                                          | 346                                                           | 332                                                             | 322                                                            |
|                                           | CD4 binding loop of OD             | 186                                                          | 202                                                           | 206                                                             | 188                                                            |
|                                           | Loop V5 of OD                      | 164                                                          | 209                                                           | 339                                                             | 301                                                            |
|                                           | <b>Heavy chain total</b>           | <b>821</b>                                                   | <b>726</b>                                                    | <b>928</b>                                                      | <b>897</b>                                                     |
|                                           | FWR                                | 54                                                           | 158                                                           | 146                                                             | 136                                                            |
|                                           | CDR H1                             | 4                                                            | 20                                                            | 38                                                              | 3                                                              |
|                                           | CDR H2                             | 489                                                          | 435                                                           | 621                                                             | 598                                                            |
|                                           | CDR H3                             | 274                                                          | 113                                                           | 123                                                             | 160                                                            |
|                                           | <b>Light chain total</b>           | <b>138</b>                                                   | <b>243</b>                                                    | <b>251</b>                                                      | <b>306</b>                                                     |
|                                           | FWR                                | 0                                                            | 0                                                             | 36                                                              | 124                                                            |
|                                           | CDR L1                             | 9                                                            | 67                                                            | 43                                                              | 50                                                             |
|                                           | CDR L2                             | 0                                                            | 0                                                             | 0                                                               | 0                                                              |
|                                           | CDR L3                             | 129                                                          | 176                                                           | 172                                                             | 132                                                            |
|                                           | <b>Heavy and light chain total</b> | <b>959</b>                                                   | <b>969</b>                                                    | <b>1179</b>                                                     | <b>1203</b>                                                    |

**Table S6. Details of the N49\_P7-gp120<sub>93TH057</sub> core<sub>e</sub>, N60\_P23-gp120<sub>93TH057</sub> core<sub>e</sub>, N6-gp120<sub>93TH057</sub> core<sub>e</sub>, and VRCO1-gp120<sub>93TH057</sub> core<sub>e</sub> interfaces, Related to Figure 6. Results as calculated by the EBI PISA server ([http://www.ebi.ac.uk/msd-srv/prot\\_int/cgi-bin/piserver](http://www.ebi.ac.uk/msd-srv/prot_int/cgi-bin/piserver))**
