# Supplementary material
Source: PubMed Central journal article supplement (PMC6003858)

### NVS60 IgG1 anti-gp120 $\kappa$

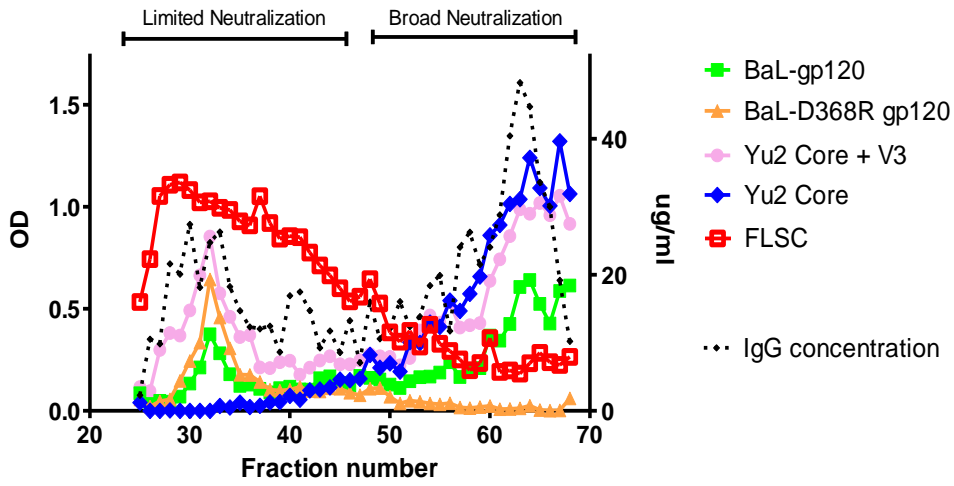

A.

### NVS60 IgG1 anti-gp120 $\lambda$

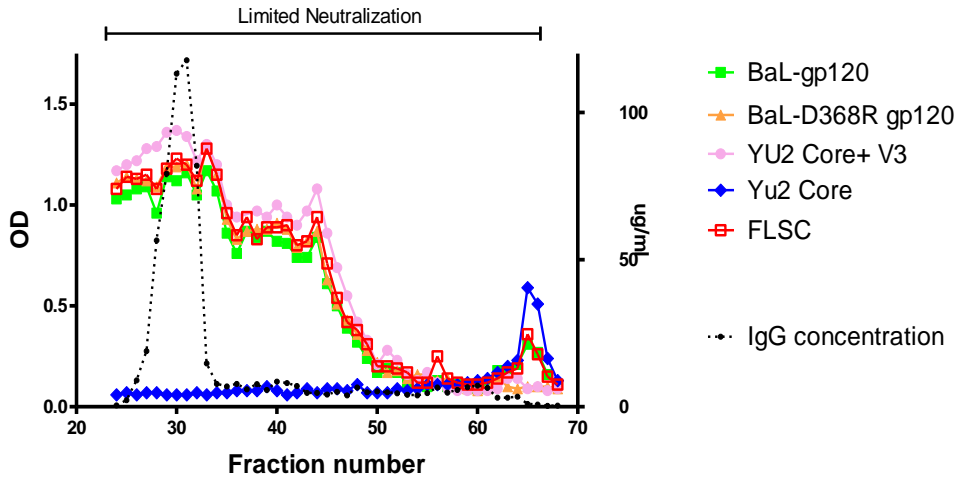

B.

Supplement: NIHMS957141-supplement-1.pdf [file NIHMS957141-supplement-1.pdf]

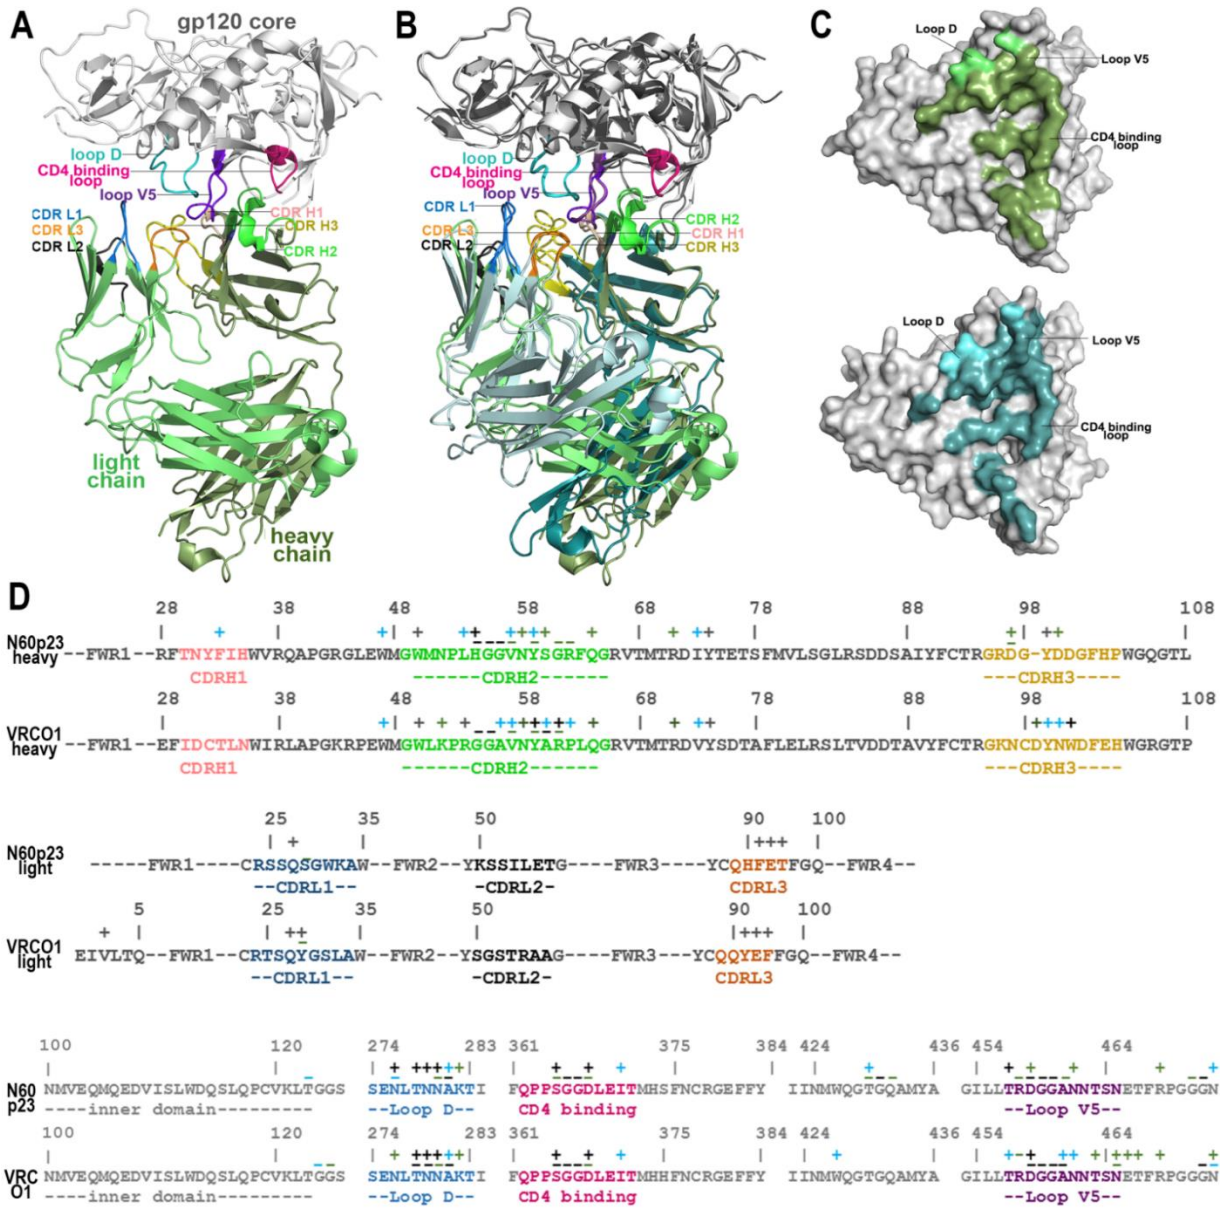

Supplement: NIHMS957141-supplement-5.pdf [file NIHMS957141-supplement-5.pdf]

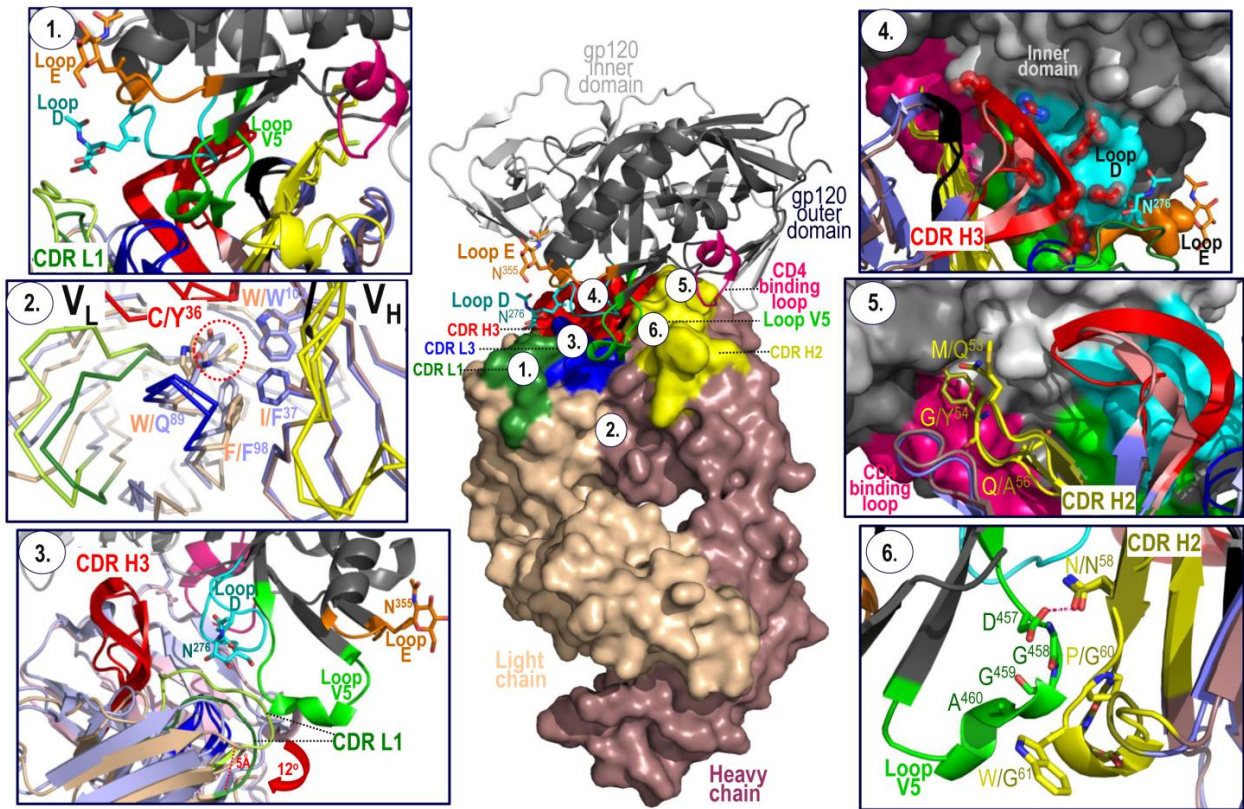

A.

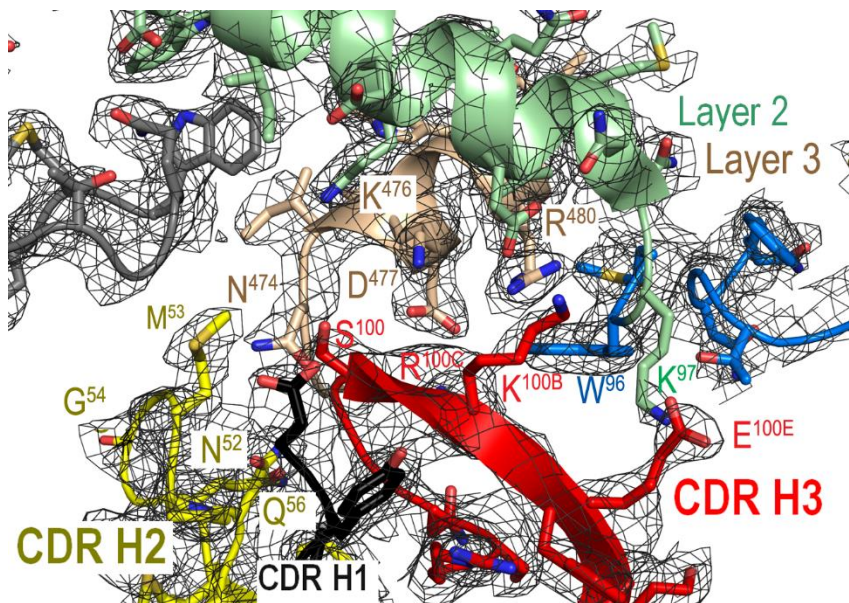

B.

Supplement: NIHMS957141-supplement-6.pdf [file NIHMS957141-supplement-6.pdf]
